# Supplementary material
Source: Springer Nature journal article supplement (https://www.springermedizin.de/resource/supplementary/13058_2010_2552_MOESM2_ESM.pdf/9701678)

### TAX followed by FEC

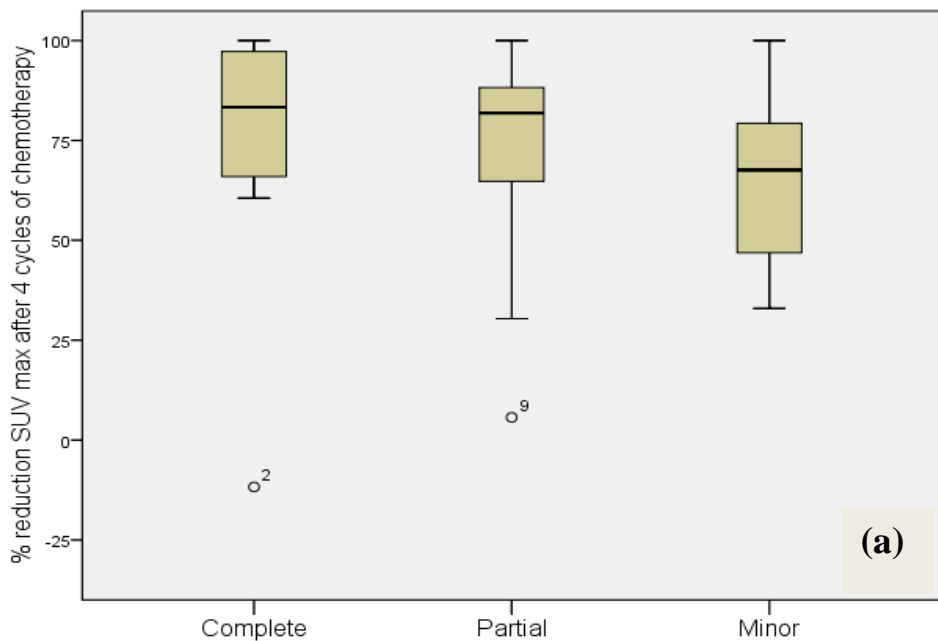

### FEC followed by TAX

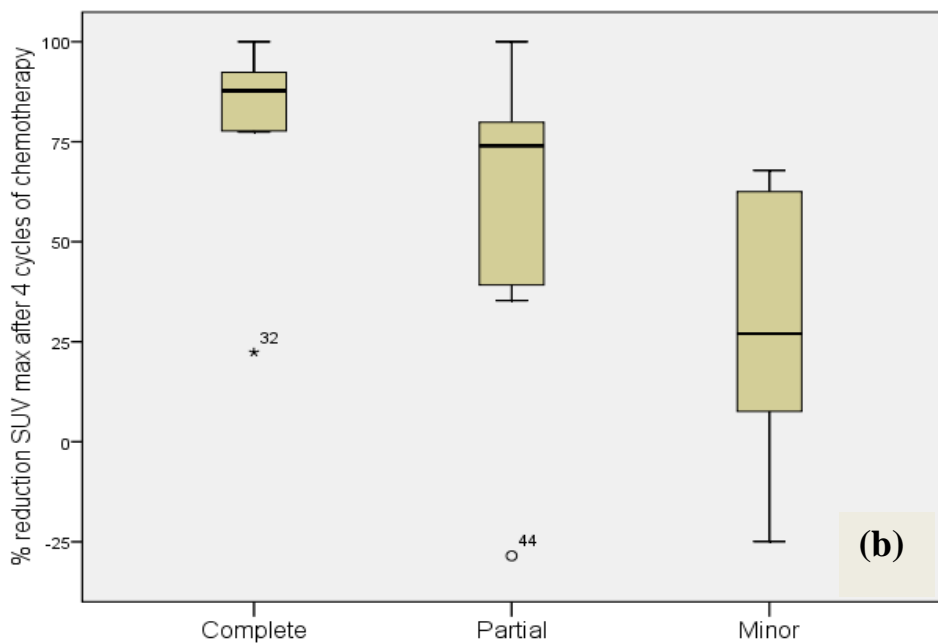

Supplement: MOESM2 [file 9701678]
